# Supplementary material for: Enzyme inclusion or fermentation of canola-based diets generate different responses in growth indicators, carcass quality, nutrient digestibility, bone strength, and blood biochemical parameters in broiler chickens
Source: Copernicus journal article supplement (doi:10.5194/aab-68-485-2025), 2025-07-25
Supplement: Supplementary file 1 [file aab-68-485-2025-supplement.pdf]

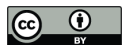

## *Supplement of*

# **Enzyme inclusion or fermentation of canola-based diets generate different responses in growth indicators, carcass quality, nutrient digestibility, bone strength, and blood biochemical parameters in broiler chickens**

**Abdul Hafeez et al.**

*Correspondence to:* Shabana Naz (drshabanaz@gcuf.edu.pk) and Ibrahim A. Alhidary (ialhidary@ksu.edu.sa)

The copyright of individual parts of the supplement might differ from the article licence.

| <b>Table S1 - Interaction effect of dietary enzyme treatment and fermentation on Feed Intake (g) in broilers</b> |                    |                    |                    |                   |                   |                   |                    |                    |                   |            |                |
|------------------------------------------------------------------------------------------------------------------|--------------------|--------------------|--------------------|-------------------|-------------------|-------------------|--------------------|--------------------|-------------------|------------|----------------|
| <b>Groups</b>                                                                                                    | <b>UC6</b>         | <b>UC12</b>        | <b>UC18</b>        | <b>EC6</b>        | <b>EC12</b>       | <b>EC18</b>       | <b>FC6</b>         | <b>FC12</b>        | <b>FC18</b>       | <b>SEM</b> | <b>P-Value</b> |
| WK1                                                                                                              | 140 <sup>a</sup>   | 120 <sup>b</sup>   | 118 <sup>b</sup>   | 142 <sup>a</sup>  | 136 <sup>a</sup>  | 118 <sup>b</sup>  | 142 <sup>a</sup>   | 137 <sup>a</sup>   | 118 <sup>b</sup>  | 2.18       | 0.00           |
| WK2                                                                                                              | 290                | 291                | 280                | 287               | 279               | 282               | 291                | 289                | 273               | 2.41       | 0.63           |
| WK3                                                                                                              | 510 <sup>ab</sup>  | 503 <sup>ab</sup>  | 512 <sup>ab</sup>  | 544 <sup>a</sup>  | 486 <sup>b</sup>  | 502 <sup>ab</sup> | 516 <sup>ab</sup>  | 489 <sup>ab</sup>  | 494 <sup>ab</sup> | 4.64       | 0.07           |
| Starter                                                                                                          | 940 <sup>ab</sup>  | 914 <sup>ab</sup>  | 910 <sup>ab</sup>  | 973 <sup>a</sup>  | 900 <sup>ab</sup> | 903 <sup>ab</sup> | 949 <sup>ab</sup>  | 915 <sup>ab</sup>  | 884 <sup>b</sup>  | 6.83       | 0.03           |
| WK4                                                                                                              | 773 <sup>ab</sup>  | 778 <sup>ab</sup>  | 772 <sup>ab</sup>  | 805 <sup>a</sup>  | 720 <sup>b</sup>  | 743 <sup>ab</sup> | 794 <sup>ab</sup>  | 750 <sup>ab</sup>  | 786 <sup>ab</sup> | 6.55       | 0.02           |
| WK5                                                                                                              | 859                | 851                | 814                | 865               | 835               | 850               | 854                | 847                | 811               | 6.22       | 0.42           |
| WK6                                                                                                              | 931                | 917                | 910                | 958               | 911               | 901               | 950                | 923                | 898               | 5.33       | 0.05           |
| Finisher                                                                                                         | 2563               | 2546               | 2496               | 2627              | 2465              | 2494              | 2598               | 2520               | 2495              | 13.9       | 0.06           |
| Overall                                                                                                          | 3504 <sup>ab</sup> | 3460 <sup>ab</sup> | 3406 <sup>ab</sup> | 3601 <sup>a</sup> | 3365 <sup>b</sup> | 3396 <sup>b</sup> | 3547 <sup>ab</sup> | 3435 <sup>ab</sup> | 3379 <sup>b</sup> | 18.6       | 0.01           |

Means in the same row with different superscripts are significantly different at  $\alpha = 0.05$

UC6: Untreated Canola at 6%

UC12: Untreated Canola at 12%

UC18: Untreated Canola at 18%

EC6: Enzyme Treated Canola at 6%

EC12: Enzyme Treated Canola at 12%

EC18: Enzyme Treated Canola at 18%

FC6: Fermented Canola at 6%

FC12: Fermented Canola at 12%

FC18: Fermented Canola at 18%

| <b>Table S2 - Interaction effect of dietary enzyme treatment and fermentation on Weight Gain (g) in broilers</b> |                    |                    |                   |                    |                    |                   |                    |                   |                   |            |                |
|------------------------------------------------------------------------------------------------------------------|--------------------|--------------------|-------------------|--------------------|--------------------|-------------------|--------------------|-------------------|-------------------|------------|----------------|
| <b>Groups</b>                                                                                                    | <b>UC6</b>         | <b>UC12</b>        | <b>UC18</b>       | <b>EC6</b>         | <b>EC12</b>        | <b>EC18</b>       | <b>FC6</b>         | <b>FC12</b>       | <b>FC18</b>       | <b>SEM</b> | <b>P-Value</b> |
| WK1                                                                                                              | 126 <sup>a</sup>   | 105 <sup>b</sup>   | 106 <sup>b</sup>  | 123 <sup>a</sup>   | 122 <sup>a</sup>   | 101 <sup>b</sup>  | 121 <sup>a</sup>   | 127 <sup>a</sup>  | 101 <sup>b</sup>  | 2.20       | <0.01          |
| WK2                                                                                                              | 253 <sup>a</sup>   | 241 <sup>ab</sup>  | 230 <sup>ab</sup> | 246 <sup>ab</sup>  | 245 <sup>ab</sup>  | 238 <sup>ab</sup> | 249 <sup>ab</sup>  | 257 <sup>a</sup>  | 221 <sup>b</sup>  | 2.64       | 0.01           |
| WK3                                                                                                              | 345 <sup>ab</sup>  | 313 <sup>bc</sup>  | 314 <sup>bc</sup> | 333 <sup>abc</sup> | 356 <sup>a</sup>   | 305 <sup>c</sup>  | 336 <sup>abc</sup> | 358 <sup>a</sup>  | 316 <sup>bc</sup> | 4.18       | <0.01          |
| Starter                                                                                                          | 724 <sup>a</sup>   | 659 <sup>bcd</sup> | 650 <sup>cd</sup> | 702 <sup>abc</sup> | 723 <sup>a</sup>   | 644 <sup>d</sup>  | 706 <sup>ab</sup>  | 743 <sup>a</sup>  | 638 <sup>d</sup>  | 7.91       | <0.01          |
| WK4                                                                                                              | 401 <sup>ab</sup>  | 379 <sup>bc</sup>  | 374 <sup>bc</sup> | 402 <sup>ab</sup>  | 418 <sup>a</sup>   | 369 <sup>c</sup>  | 401 <sup>ab</sup>  | 418 <sup>a</sup>  | 373 <sup>bc</sup> | 4.00       | <0.01          |
| WK5                                                                                                              | 357 <sup>abc</sup> | 332 <sup>abc</sup> | 313 <sup>c</sup>  | 350 <sup>abc</sup> | 373 <sup>a</sup>   | 323 <sup>bc</sup> | 356 <sup>abc</sup> | 371 <sup>ab</sup> | 317 <sup>c</sup>  | 5.07       | <0.01          |
| WK6                                                                                                              | 371 <sup>a</sup>   | 346 <sup>bc</sup>  | 343 <sup>bc</sup> | 371 <sup>a</sup>   | 361 <sup>abc</sup> | 343 <sup>bc</sup> | 367 <sup>ab</sup>  | 374 <sup>a</sup>  | 341 <sup>c</sup>  | 2.93       | <0.01          |
| Finisher                                                                                                         | 1129 <sup>a</sup>  | 1056 <sup>bc</sup> | 1030 <sup>c</sup> | 1123 <sup>ab</sup> | 1152 <sup>a</sup>  | 1035 <sup>c</sup> | 1124 <sup>ab</sup> | 1163 <sup>a</sup> | 1031 <sup>c</sup> | 10.90      | <0.01          |
| Overall                                                                                                          | 1852 <sup>a</sup>  | 1716 <sup>b</sup>  | 1680 <sup>b</sup> | 1825 <sup>a</sup>  | 1874 <sup>a</sup>  | 1679 <sup>b</sup> | 1830 <sup>a</sup>  | 1906 <sup>a</sup> | 1669 <sup>b</sup> | 18.27      | <0.01          |

Means in the same row with different superscripts are significantly different at  $\alpha=0.05$

UC6: Untreated Canola at 6%

UC12: Untreated Canola at 12%

UC18: Untreated Canola at 18%

EC6: Enzyme Treated Canola at 6%

EC12: Enzyme Treated Canola at 12%

EC18: Enzyme Treated Canola at 18%

FC6: Fermented Canola at 6%

FC12: Fermented Canola at 12%

FC18: Fermented Canola at 18%

| <b>Table S3 - Interaction effect of dietary enzyme treatment and fermentation on Feed Conversion Ratio in broilers</b> |                     |                    |                    |                     |                    |                    |                     |                    |                    |            |                |
|------------------------------------------------------------------------------------------------------------------------|---------------------|--------------------|--------------------|---------------------|--------------------|--------------------|---------------------|--------------------|--------------------|------------|----------------|
| <b>Groups</b>                                                                                                          | <b>UC6</b>          | <b>UC12</b>        | <b>UC18</b>        | <b>EC6</b>          | <b>EC12</b>        | <b>EC18</b>        | <b>FC6</b>          | <b>FC12</b>        | <b>FC18</b>        | <b>SEM</b> | <b>P-Value</b> |
| WK1                                                                                                                    | 1.11                | 1.15               | 1.12               | 1.15                | 1.12               | 1.17               | 1.17                | 1.07               | 1.17               | .009       | 0.60           |
| WK2                                                                                                                    | 1.15                | 1.21               | 1.22               | 1.17                | 1.14               | 1.19               | 1.17                | 1.13               | 1.23               | .013       | 0.53           |
| WK3                                                                                                                    | 1.49 <sup>ab</sup>  | 1.61 <sup>ab</sup> | 1.63 <sup>ab</sup> | 1.64 <sup>a</sup>   | 1.37 <sup>b</sup>  | 1.65 <sup>a</sup>  | 1.54 <sup>ab</sup>  | 1.37 <sup>b</sup>  | 1.56 <sup>ab</sup> | .025       | 0.05           |
| Starter                                                                                                                | 1.30 <sup>abc</sup> | 1.39 <sup>a</sup>  | 1.40 <sup>a</sup>  | 1.39 <sup>a</sup>   | 1.25 <sup>bc</sup> | 1.40 <sup>a</sup>  | 1.35 <sup>abc</sup> | 1.23 <sup>c</sup>  | 1.39 <sup>ab</sup> | .015       | 0.01           |
| WK4                                                                                                                    | 1.94 <sup>abc</sup> | 2.06 <sup>ab</sup> | 2.07 <sup>ab</sup> | 2.00 <sup>abc</sup> | 1.72 <sup>c</sup>  | 2.01 <sup>ab</sup> | 1.98 <sup>abc</sup> | 1.79 <sup>bc</sup> | 2.11 <sup>a</sup>  | .029       | 0.02           |
| WK5                                                                                                                    | 2.42                | 2.57               | 2.61               | 2.48                | 2.24               | 2.63               | 2.40                | 2.28               | 2.57               | .038       | 0.95           |
| WK6                                                                                                                    | 2.51 <sup>ab</sup>  | 2.65 <sup>a</sup>  | 2.66 <sup>a</sup>  | 2.58 <sup>ab</sup>  | 2.52 <sup>ab</sup> | 2.63 <sup>ab</sup> | 2.59 <sup>ab</sup>  | 2.47 <sup>b</sup>  | 2.63 <sup>a</sup>  | .016       | 0.05           |
| Finisher                                                                                                               | 2.28 <sup>ab</sup>  | 2.41 <sup>a</sup>  | 2.42 <sup>a</sup>  | 2.34 <sup>ab</sup>  | 2.14 <sup>b</sup>  | 2.41 <sup>a</sup>  | 2.31 <sup>ab</sup>  | 2.16 <sup>b</sup>  | 2.42 <sup>a</sup>  | .024       | 0.01           |
| Overall                                                                                                                | 1.90 <sup>ab</sup>  | 2.02 <sup>a</sup>  | 2.03 <sup>a</sup>  | 1.97 <sup>a</sup>   | 1.80 <sup>b</sup>  | 2.02 <sup>a</sup>  | 1.94 <sup>ab</sup>  | 1.80 <sup>b</sup>  | 2.03 <sup>a</sup>  | .019       | <0.01          |

Means in the same row with different superscripts are significantly different at  $\alpha=0.05$

**Table S4 - Interaction effect of dietary enzyme treatment and fermentation on percent Apparent Total Digestibility (ATD) of nutrients at finisher phase in broilers**

| Groups | UC6                  | UC12               | UC18               | EC6                | EC12               | EC18               | FC6                 | FC12               | FC18                | SEM  | P-Value |
|--------|----------------------|--------------------|--------------------|--------------------|--------------------|--------------------|---------------------|--------------------|---------------------|------|---------|
| DM     | 72.6                 | 72.6               | 73.4               | 71.9               | 74.7               | 71.0               | 71.5                | 74.6               | 75.5                | 0.43 | 0.30    |
| ASH    | 46.5                 | 47.9               | 45.3               | 48.2               | 48.2               | 47.3               | 48.0                | 48.7               | 46.8                | 0.41 | 0.68    |
| CP     | 70.3 <sup>ab</sup>   | 60.0 <sup>c</sup>  | 59.8 <sup>c</sup>  | 59.7 <sup>c</sup>  | 73.9 <sup>a</sup>  | 61.6 <sup>c</sup>  | 70.9 <sup>a</sup>   | 72.6 <sup>a</sup>  | 65.1 <sup>bc</sup>  | 0.99 | <0.01   |
| CF     | 78.4 <sup>a</sup>    | 70.8 <sup>b</sup>  | 68.5 <sup>b</sup>  | 70.7 <sup>b</sup>  | 79.6 <sup>a</sup>  | 67.5 <sup>b</sup>  | 78.8 <sup>a</sup>   | 79.2 <sup>a</sup>  | 74.4 <sup>ab</sup>  | 0.90 | <0.01   |
| NFE    | 83.1 <sup>abcd</sup> | 79.3 <sup>d</sup>  | 80.1 <sup>cd</sup> | 78.6 <sup>d</sup>  | 85.5 <sup>ab</sup> | 79.8 <sup>d</sup>  | 85.1 <sup>abc</sup> | 86.0 <sup>a</sup>  | 80.4 <sup>bcd</sup> | 0.57 | <0.01   |
| Ca     | 28.1 <sup>ab</sup>   | 24.7 <sup>b</sup>  | 24.6 <sup>b</sup>  | 26.2 <sup>ab</sup> | 29.9 <sup>a</sup>  | 27.1 <sup>ab</sup> | 24.9 <sup>b</sup>   | 29.9 <sup>a</sup>  | 24.9 <sup>b</sup>   | 0.43 | <0.01   |
| P      | 29.2 <sup>ab</sup>   | 24.5 <sup>ab</sup> | 23.8 <sup>b</sup>  | 24.8 <sup>ab</sup> | 30.3 <sup>a</sup>  | 23.2 <sup>b</sup>  | 24.9 <sup>ab</sup>  | 29.2 <sup>ab</sup> | 24.1 <sup>b</sup>   | 0.58 | 0.01    |

Means in the same row with different superscripts are significantly different at  $\alpha=0.05$

UC6: Untreated Canola at 6%

UC12: Untreated Canola at 12%

UC18: Untreated Canola at 18%

EC6: Enzyme Treated Canola at 6%

EC12: Enzyme Treated Canola at 12%

EC18: Enzyme Treated Canola at 18%

FC6: Fermented Canola at 6%

FC12: Fermented Canola at 12%

FC18: Fermented Canola at 18%

| <b>Table S5 - Interaction effect of dietary enzyme treatment and fermentation on bone quality in broilers</b> |                     |                    |                   |                    |                    |                    |                   |                   |                     |            |                |
|---------------------------------------------------------------------------------------------------------------|---------------------|--------------------|-------------------|--------------------|--------------------|--------------------|-------------------|-------------------|---------------------|------------|----------------|
| <b>Groups</b>                                                                                                 | <b>UC6</b>          | <b>UC12</b>        | <b>UC18</b>       | <b>EC6</b>         | <b>EC12</b>        | <b>EC18</b>        | <b>FC6</b>        | <b>FC12</b>       | <b>FC18</b>         | <b>SEM</b> | <b>P-Value</b> |
| Bone Weight (g)                                                                                               | 7.86 <sup>ab</sup>  | 5.67 <sup>b</sup>  | 5.68 <sup>b</sup> | 6.48 <sup>ab</sup> | 8.15 <sup>ab</sup> | 5.33 <sup>b</sup>  | 8.89 <sup>a</sup> | 8.98 <sup>a</sup> | 6.52 <sup>ab</sup>  | 0.31       | <0.01          |
| Bone Length (cm)                                                                                              | 90.5                | 89.0               | 93.5              | 92.6               | 89.2               | 88.9               | 86.4              | 86.8              | 87.0                | 0.76       | 0.29           |
| BW: BoneWt                                                                                                    | 246                 | 255                | 248               | 251                | 256                | 249                | 255               | 246               | 254                 | 1.54       | 0.71           |
| Robusticity Index                                                                                             | 4.56 <sup>abc</sup> | 5.00 <sup>ab</sup> | 5.24 <sup>a</sup> | 4.97 <sup>ab</sup> | 4.43 <sup>bc</sup> | 5.11 <sup>ab</sup> | 4.17 <sup>c</sup> | 4.18 <sup>c</sup> | 4.73 <sup>abc</sup> | 0.08       | <0.01          |
| Tibio Tarsal Index                                                                                            | 44.0                | 38.5               | 37.2              | 35.9               | 38.4               | 35.9               | 34.1              | 27.8              | 32.4                | 1.26       | 1.66           |

Means in the same row with different superscripts are significantly different at  $\alpha = 0.05$

UC6: Untreated Canola at 6%

UC12: Untreated Canola at 12%

UC18: Untreated Canola at 18%

EC6: Enzyme Treated Canola at 6%

EC12: Enzyme Treated Canola at 12%

EC18: Enzyme Treated Canola at 18%

FC6: Fermented Canola at 6%

FC12: Fermented Canola at 12%

FC18: Fermented Canola at 18%

| <b>Table S6 - Interaction effect of dietary enzyme treatment and fermentation on carcass characteristics in broilers</b> |                      |                    |                   |                     |                      |                    |                    |                    |                     |            |                |
|--------------------------------------------------------------------------------------------------------------------------|----------------------|--------------------|-------------------|---------------------|----------------------|--------------------|--------------------|--------------------|---------------------|------------|----------------|
| <b>Groups</b>                                                                                                            | <b>UC6</b>           | <b>UC12</b>        | <b>UC18</b>       | <b>EC6</b>          | <b>EC12</b>          | <b>EC18</b>        | <b>FC6</b>         | <b>FC12</b>        | <b>FC18</b>         | <b>SEM</b> | <b>P-Value</b> |
| Dressing %                                                                                                               | 68.97 <sup>a</sup>   | 62.6 <sup>cd</sup> | 61.7 <sup>d</sup> | 65.7 <sup>abc</sup> | 68.43 <sup>ab</sup>  | 66.3 <sup>ab</sup> | 66.9 <sup>ab</sup> | 68.97 <sup>a</sup> | 65.4 <sup>bc</sup>  | 0.52       | <0.01          |
| Eviscerated Weight (%)                                                                                                   | 77.21 <sup>abc</sup> | 71.7 <sup>c</sup>  | 71.5 <sup>c</sup> | 78.8 <sup>abc</sup> | 78.60 <sup>abc</sup> | 73.3 <sup>bc</sup> | 81.2 <sup>ab</sup> | 82.34 <sup>a</sup> | 77.1 <sup>abc</sup> | 0.85       | <0.01          |
| Giblet Weight (g)                                                                                                        | 76.00                | 96.7               | 75.3              | 74.3                | 84.33                | 75.3               | 79.0               | 77.67              | 80.3                | 1.82       | 0.06           |
| Abdominal Fat Weight (g)                                                                                                 | 1.67                 | 1.67               | 1.91              | 1.53                | 1.70                 | 1.84               | 1.55               | 1.61               | 1.73                | 0.04       | 0.30           |
| Meat pH                                                                                                                  | 5.97                 | 5.97               | 5.97              | 6.00                | 5.97                 | 5.97               | 5.97               | 5.97               | 5.97                | 0.01       | 1.00           |

Means in the same row with different superscripts are significantly different at  $\alpha = 0.05$

UC6: Untreated Canola at 6%

UC12: Untreated Canola at 12%

UC18: Untreated Canola at 18%

EC6: Enzyme Treated Canola at 6%

EC12: Enzyme Treated Canola at 12%

EC18: Enzyme Treated Canola at 18%

FC6: Fermented Canola at 6%

FC12: Fermented Canola at 12%

FC18: Fermented Canola at 18%

**Table S7- Interaction effect of dietary enzyme treatment and fermentation on blood biochemical parameters at finisher phase in broilers**

|                           | <b>UC6</b> | <b>UC12</b> | <b>UC18</b> | <b>EC6</b> | <b>EC12</b> | <b>EC18</b> | <b>FC6</b> | <b>FC12</b> | <b>FC18</b> | <b>SEM</b> | <b>P-value</b> |
|---------------------------|------------|-------------|-------------|------------|-------------|-------------|------------|-------------|-------------|------------|----------------|
| Triglycerides (mg/dL)     | 42.1       | 41.9        | 40.5        | 39.8       | 39.2        | 41.6        | 39.2       | 38.6        | 36.9        | 0.45       | 0.08           |
| LDL (mg/dL)               | 40.4       | 37.2        | 36.2        | 37.9       | 42.4        | 37.1        | 41.4       | 38.3        | 40.0        | 0.72       | 0.48           |
| HDL (mg/dL)               | 55.1       | 54.8        | 59.2        | 61.1       | 54.0        | 55.5        | 56.1       | 60.3        | 58.1        | 0.71       | 0.13           |
| Total Cholesterol (mg/dL) | 103.9      | 100.4       | 103.4       | 107.0      | 104.3       | 100.9       | 105.3      | 106.2       | 105.6       | 0.91       | 0.76           |
| Blood Glucose (mg/dL)     | 111.6      | 111.7       | 111.8       | 111.7      | 111.6       | 111.9       | 111.3      | 112.3       | 111.8       | 0.83       | 0.87           |
| Total Protein (g/dL)      | 4.50       | 4.37        | 3.90        | 4.37       | 4.17        | 4.03        | 3.97       | 4.43        | 4.60        | 0.12       | 0.93           |

UC6: Untreated Canola at 6%

EC6: Enzyme Treated Canola at 6%

FC6: Fermented Canola at 6%

UC12: Untreated Canola at 12%

EC12: Enzyme Treated Canola at 12%

FC12: Fermented Canola at 12%

UC18: Untreated Canola at 18%

EC18: Enzyme Treated Canola at 18%

FC18: Fermented Canola at 18%
